# Supplementary material for: Mutual diffusion in binary mixtures of ionic liquids and molecular liquids by dynamic light scattering (DLS)
Source: Royal Society of Chemistry journal article supplement (doi:10.1039/c1cp20208a), 2011-01-01
Supplement: c1cp20208a.pdf [file c1cp20208a.pdf]

## Electronic supplementary information

**ESI 1** Refractive index  $n_D$  at the sodium line ( $\lambda_D = 589.3$  nm), refractive index difference  $n_F - n_C$  for the Fraunhofer lines F ( $\lambda_F = 486.1$  nm) and C ( $\lambda_C = 656.3$  nm), and mutual diffusion coefficients  $D_{12}$  of binary mixtures of [EMIM][EtSO<sub>4</sub>] + solvents

| solvent      | $x_{\text{solvent}}$ | $T/\text{K}$ | $n_D$  | $n_F - n_C$ | $D_{12}/10^{-9} \text{ m}^2 \text{ s}^{-1}$ |
|--------------|----------------------|--------------|--------|-------------|---------------------------------------------|
| acetone      | 0.000                | 293.15       | 1.4796 | 0.0096      | -                                           |
|              | 0.101                | 293.15       | 1.4758 | 0.0092      | 0.0714                                      |
|              | 0.200                | 293.15       | 1.4735 | 0.0094      | 0.0878                                      |
|              | 0.301                | 293.15       | 1.4673 | 0.0095      | 0.114                                       |
|              | 0.501                | 293.15       | 1.4554 | 0.0091      | 0.204                                       |
|              | 0.701                | 293.15       | 1.4331 | 0.0088      | 0.257                                       |
|              | 0.800                | 283.15       | 1.4218 | 0.0080      | 0.223                                       |
|              | 0.800                | 288.15       | 1.4201 | 0.0079      | 0.244                                       |
|              | 0.800                | 293.15       | 1.4181 | 0.0085      | 0.269                                       |
|              | 0.800                | 298.15       | 1.4172 | 0.0082      | 0.292                                       |
|              | 0.800                | 303.15       | 1.4157 | 0.0083      | 0.309                                       |
|              | 0.800                | 308.15       | 1.4141 | 0.0083      | 0.336                                       |
|              | 0.800                | 313.15       | 1.4130 | 0.0081      | 0.360                                       |
|              | 0.800                | 318.15       | 1.4117 | 0.0085      | 0.381                                       |
|              | 0.800                | 323.15       | 1.4104 | 0.0085      | 0.414                                       |
|              | 0.900                | 293.15       | 1.3931 | 0.0081      | 0.317                                       |
|              | 0.950                | 293.15       | 1.3788 | 0.0077      | 0.448                                       |
|              | 0.975                | 293.15       | 1.3702 | 0.0075      | 0.624                                       |
|              | 0.990                | 293.15       | 1.3634 | 0.0073      | 1.18                                        |
|              | 0.995                | 293.15       | 1.3602 | 0.0072      | 1.78                                        |
| 1.000        | 293.15               | 1.3585       | 0.0068 | -           |                                             |
| acetonitrile | 0.100                | 293.15       | 1.4778 | 0.0096      | 0.0532                                      |
|              | 0.201                | 293.15       | 1.4747 | 0.0094      | 0.0834                                      |
|              | 0.301                | 293.15       | 1.4700 | 0.0094      | 0.109                                       |
|              | 0.503                | 293.15       | 1.4565 | 0.0092      | 0.214                                       |
|              | 0.701                | 293.15       | 1.4353 | 0.0085      | 0.387                                       |
|              | 0.800                | 293.15       | 1.4200 | 0.0076      | 0.535                                       |
|              | 0.900                | 293.15       | 1.3913 | 0.0069      | 0.745                                       |
|              | 0.950                | 293.15       | 1.3709 | 0.0066      | 0.942                                       |
|              | 0.975                | 293.15       | 1.3591 | 0.0062      | 1.22                                        |
|              | 0.990                | 293.15       | 1.3510 | 0.0063      | 1.72                                        |
|              | 0.995                | 293.15       | 1.3498 | 0.0063      | 1.82                                        |
|              | 1.000                | 293.15       | 1.3439 | 0.0061      | -                                           |

|                |       |        |        |        |        |
|----------------|-------|--------|--------|--------|--------|
| dichloromethan | 0.304 | 293.15 | 1.4762 | 0.0095 | 0.111  |
|                | 0.500 | 293.15 | 1.4718 | 0.0093 | 0.192  |
|                | 0.701 | 293.15 | 1.4639 | 0.0092 | 0.325  |
|                | 0.801 | 293.15 | 1.4573 | 0.0092 | 0.394  |
|                | 0.900 | 293.15 | 1.4491 | 0.0089 | 0.484  |
|                | 0.950 | 293.15 | 1.4420 | 0.0087 | 0.463  |
|                | 0.975 | 293.15 | 1.4355 | 0.0086 | 0.453  |
|                | 0.990 | 293.15 | 1.4304 | 0.0085 | 0.537  |
|                | 0.995 | 293.15 | 1.4290 | 0.0085 | 0.919  |
|                | 1.000 | 293.15 | 1.4249 | 0.0084 | -      |
| ethanol        | 0.101 | 293.15 | 1.4762 | 0.0096 | 0.0460 |
|                | 0.201 | 293.15 | 1.4724 | 0.0096 | 0.0595 |
|                | 0.302 | 293.15 | 1.4689 | 0.0096 | 0.0829 |
|                | 0.501 | 293.15 | 1.4570 | 0.0094 | 0.138  |
|                | 0.701 | 293.15 | 1.4346 | 0.0087 | 0.224  |
|                | 0.800 | 293.15 | 1.4196 | 0.0083 | 0.258  |
|                | 0.900 | 293.15 | 1.3964 | 0.0077 | 0.295  |
|                | 0.950 | 293.15 | 1.3811 | 0.0072 | 0.330  |
|                | 0.969 | 293.15 | 1.3761 | 0.0072 | 0.354  |
|                | 0.990 | 293.15 | 1.3662 | 0.0066 | 0.398  |
| water          | 0.101 | 293.15 | 1.4788 | 0.0097 | 0.108  |
|                | 0.202 | 293.15 | 1.4780 | 0.0099 | 0.145  |
|                | 0.306 | 293.15 | 1.4743 | 0.0097 | 0.198  |
|                | 0.500 | 293.15 | 1.4684 | 0.0090 | 0.223  |
|                | 0.700 | 293.15 | 1.4562 | 0.0089 | 0.291  |
|                | 0.800 | 293.15 | 1.4428 | 0.0090 | 0.412  |
|                | 0.900 | 293.15 | 1.4147 | 0.0083 | 0.504  |
|                | 0.950 | 293.15 | 1.3879 | 0.0075 | 0.521  |
|                | 0.975 | 293.15 | 1.3643 | 0.0082 | 0.559  |
|                | 0.990 | 293.15 | 1.3476 | 0.0069 | 0.632  |
|                | 0.995 | 293.15 | 1.3410 | 0.0066 | 1.14   |
|                | 1.000 | 293.15 | 1.3330 | 0.0060 | -      |

---

**ESI 2** Refractive index  $n_D$  at the sodium line ( $\lambda_D = 589.3$  nm), refractive index difference  $n_F - n_C$  for the Fraunhofer lines F ( $\lambda_F = 486.1$  nm) and C ( $\lambda_C = 656.3$  nm), and mutual diffusion coefficients  $D_{12}$  of binary mixtures of [EMIM][MeSO<sub>3</sub>] + solvents

| solvent  | $x_{\text{solvent}}$ | $T/\text{K}$ | $n_D$  | $n_F - n_C$ | $D_{12}/10^{-9} \text{ m}^2 \text{ s}^{-1}$ |
|----------|----------------------|--------------|--------|-------------|---------------------------------------------|
| acetone  | 0.000                | 293.15       | 1.4968 | 0.0076      | -                                           |
|          | 0.051                | 293.15       | 1.4948 | 0.0102      | 0.0369                                      |
|          | 0.095                | 293.15       | 1.4930 | 0.0101      | 0.0401                                      |
|          | 0.203                | 278.15       | 1.4920 | 0.0090      | 0.0327                                      |
|          | 0.203                | 283.15       | 1.4905 | 0.0088      | 0.0406                                      |
|          | 0.203                | 288.15       | 1.4896 | 0.0089      | 0.0535                                      |
|          | 0.203                | 293.15       | 1.4875 | 0.0087      | 0.0738                                      |
|          | 0.203                | 298.15       | 1.4870 | 0.0087      | 0.0857                                      |
|          | 0.203                | 303.15       | 1.4856 | 0.0100      | 0.0990                                      |
|          | 0.203                | 308.15       | 1.4842 | 0.0088      | 0.125                                       |
|          | 0.302                | 293.15       | 1.4818 | 0.0098      | 0.0911                                      |
|          | 0.502                | 278.15       | 1.4708 | 0.0084      | 0.0965                                      |
|          | 0.502                | 283.15       | 1.4679 | 0.0084      | 0.107                                       |
|          | 0.502                | 288.15       | 1.4673 | 0.0084      | 0.125                                       |
|          | 0.502                | 293.15       | 1.4662 | 0.0083      | 0.145                                       |
|          | 0.502                | 298.15       | 1.4648 | 0.0081      | 0.167                                       |
|          | 0.502                | 303.15       | 1.4658 | 0.0083      | 0.193                                       |
|          | 0.502                | 308.15       | 1.4609 | 0.0092      | 0.214                                       |
|          | 0.701                | 278.15       | 1.4444 | 0.0090      | 0.0812                                      |
|          | 0.701                | 283.15       | 1.4433 | 0.0087      | 0.0893                                      |
|          | 0.701                | 288.15       | 1.4417 | 0.0089      | 0.101                                       |
|          | 0.701                | 293.15       | 1.4410 | 0.0090      | 0.116                                       |
|          | 0.701                | 298.15       | 1.4389 | 0.0088      | 0.132                                       |
|          | 0.701                | 303.15       | 1.4363 | 0.0089      | 0.145                                       |
|          | 0.701                | 308.15       | 1.4351 | 0.0087      | 0.167                                       |
|          | 0.801                | 293.15       | 1.4205 | -           | 0.0366                                      |
| 0.950    | 293.15               | 1.3796       | -      | 0.189       |                                             |
| 0.975    | 293.15               | 1.3690       | 0.0075 | 0.549       |                                             |
| 0.990    | 293.15               | 1.3636       | 0.0070 | 0.984       |                                             |
| methanol | 0.106                | 293.15       | 1.4928 | 0.0075      | 0.0701                                      |
|          | 0.188                | 293.15       | 1.4903 | 0.0101      | 0.101                                       |
|          | 0.300                | 293.15       | 1.4846 | 0.0100      | 0.114                                       |
|          | 0.503                | 293.15       | 1.4689 | 0.0096      | 0.233                                       |
|          | 0.700                | 293.15       | 1.4428 | 0.0088      | 0.477                                       |
|          | 0.869                | 293.15       | 1.4009 | 0.0078      | 0.796                                       |
|          | 0.951                | 293.15       | 1.3643 | 0.0068      | 1.24                                        |

|       |       |        |        |        |       |
|-------|-------|--------|--------|--------|-------|
|       | 0.975 | 293.15 | 1.3484 | 0.0065 | 1.87  |
|       | 0.989 | 293.15 | 1.3382 | 0.0062 | 2.26  |
|       | 0.992 | 293.15 | 1.3357 | 0.0056 | 3.07  |
| water | 0.205 | 293.15 | 1.4927 | 0.0102 | 0.164 |
|       | 0.309 | 293.15 | 1.4896 | 0.0102 | 0.201 |
|       | 0.500 | 293.15 | 1.4823 | 0.0098 | 0.268 |
|       | 0.704 | 293.15 | 1.4656 | 0.0097 | 0.387 |
|       | 0.801 | 293.15 | 1.4496 | 0.0093 | 0.579 |
|       | 0.901 | 293.15 | 1.4180 | 0.0082 | 0.753 |
|       | 0.950 | 293.15 | 1.3860 | 0.0073 | 0.835 |
|       | 0.975 | 293.15 | 1.3640 | 0.0067 | 0.884 |
|       | 0.990 | 293.15 | 1.3468 | 0.0063 | 0.909 |
|       | 0.995 | 293.15 | 1.3406 | 0.0064 | 0.917 |

---
